# Supplementary material for: Evidence for the involvement of gamma delta T cells in the immune response in Rasmussen encephalitis
Source: Springer Nature journal article supplement (doi:10.1186/s12974-015-0352-2), 2015-07-18
Supplement: MOESM2 [file 9768756]

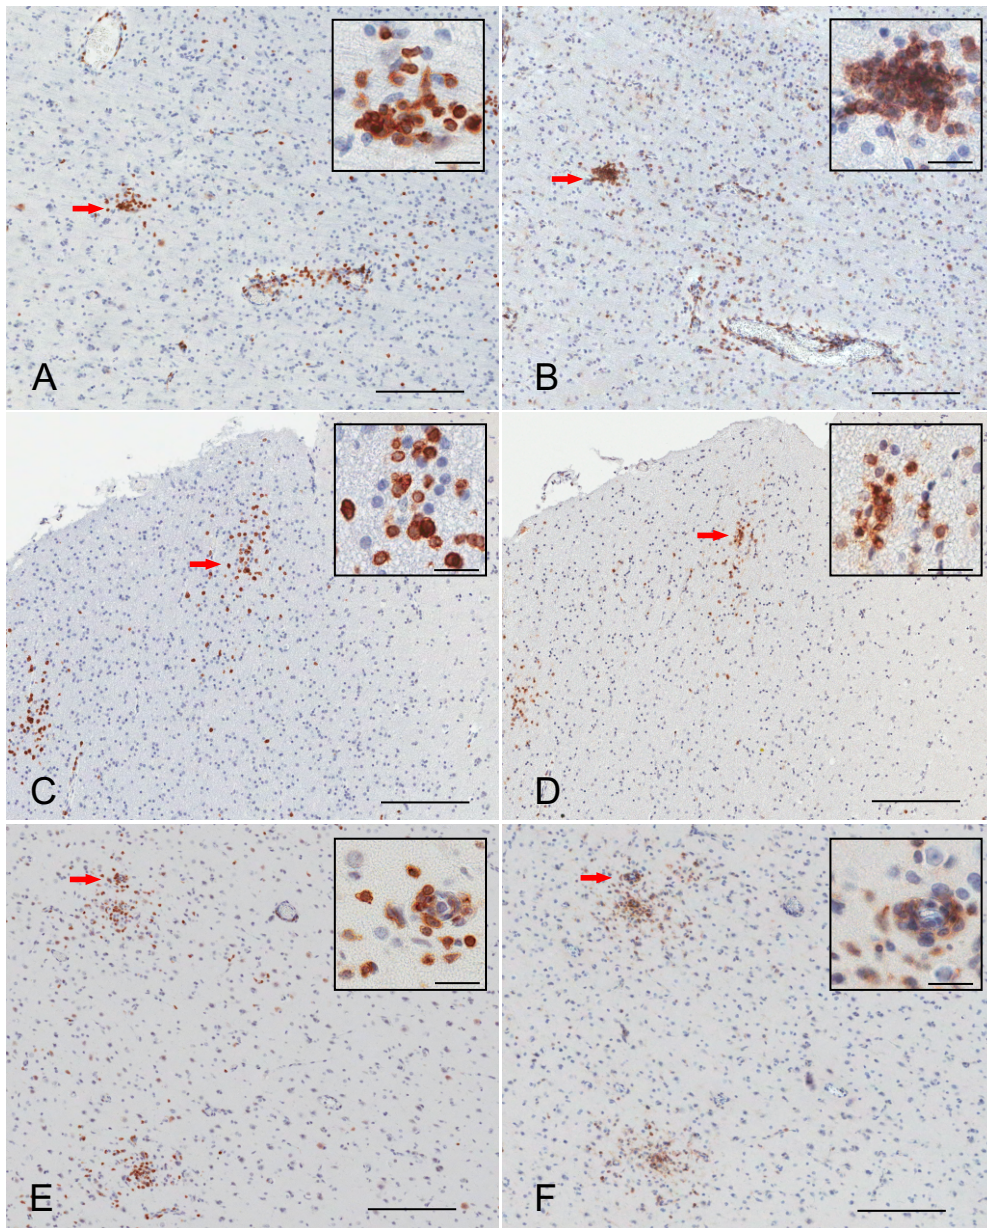

Figure S1: CD69 expression by T cells in resected RE brain tissue. Sections of cortex from three RE surgery cases (A,B RECP27; C,D RECP34; D,E RECP37) were stained with either a CD3 polyclonal antibody (A, C, E) or a CD69 mAb (B, D, F). Clusters of T cells, identified by CD3 immunostaining, contain CD69-positive cells. Insets show higher magnification of cells in the upper clusters in each panel (arrows). Scale bars correspond to 200  $\mu\text{m}$  and 25  $\mu\text{m}$  (insets).
